# Supplementary material for: A novel photochemical sensor based on quinoline-functionalized phenazine derivatives for multiple substrate detection
Source: Royal Society of Chemistry journal article supplement (doi:10.1039/d0nj06175a), 2021-01-01
Supplement: d0nj06175a2.pdf [file d0nj06175a2.pdf]

## Supporting Information

### A Novel Photochemical Sensor Based on Quinoline Functionalized Phenazine Derivatives for Multiple Substrates Detection

Tai-Bao Wei <sup>a\*</sup>, Hong-Qiang Dong <sup>a</sup>, Xiao-Qiang Ma <sup>a</sup>, Qing-Yu Yang <sup>a</sup>, Zhong-Hui Wang <sup>a</sup>,  
Yun-Fei Zhang <sup>a</sup>, Wen-Li Guan <sup>a</sup>, You-Ming Zhang <sup>a,b</sup>, Hong Yao <sup>a</sup>, Qi Lin <sup>a\*</sup>

<sup>a</sup> *Key Laboratory of Eco-functional Polymer Materials of the Ministry of Education; Key  
Laboratory of Eco-environmental Polymer Materials of Gansu Province, College of  
Chemistry and Chemical Engineering, Northwest Normal University, Lanzhou, Gansu,  
730070, China*

*E-mail: [weitaibao@126.com](mailto:weitaibao@126.com). [linqi2004@126.com](mailto:linqi2004@126.com)*

<sup>b</sup> *Gansu Natural Energy Research Institute, Lanzhou, Gansu 730046, China.*

#### Supporting Information:

Number of pages: 1-26

Number of Figure: S1-S34

## Contents

|                                                                                                                                                                                                                                                                                                                                                                                                                                                                                                                                                                 |    |
|-----------------------------------------------------------------------------------------------------------------------------------------------------------------------------------------------------------------------------------------------------------------------------------------------------------------------------------------------------------------------------------------------------------------------------------------------------------------------------------------------------------------------------------------------------------------|----|
| <b>Fig. S1</b> $^1\text{H}$ NMR spectrum of <b>1</b> in $\text{DMSO-}d_6$ .....                                                                                                                                                                                                                                                                                                                                                                                                                                                                                 | 4  |
| <b>Fig. S2</b> $^1\text{H}$ NMR spectrum of <b>2</b> in $\text{CDCl}_3$ .....                                                                                                                                                                                                                                                                                                                                                                                                                                                                                   | 4  |
| <b>Fig. S3</b> $^1\text{H}$ NMR spectrum of <b>FQ-5</b> in $\text{DMSO-}d_6$ .....                                                                                                                                                                                                                                                                                                                                                                                                                                                                              | 5  |
| <b>Fig. S4</b> $^{13}\text{C}$ NMR spectrum of <b>FQ-5</b> in $\text{DMSO-}d_6$ .....                                                                                                                                                                                                                                                                                                                                                                                                                                                                           | 5  |
| <b>Fig. S5</b> IR spectrum of <b>FQ-5</b> in KBr disks.....                                                                                                                                                                                                                                                                                                                                                                                                                                                                                                     | 6  |
| <b>Fig. S6</b> ESI-MS spectrum of <b>FQ-5</b> .....                                                                                                                                                                                                                                                                                                                                                                                                                                                                                                             | 6  |
| <b>Fig.S7</b> Fluorescence emission spectra of <b>FQ-5</b> at different water ratios. ( $\lambda_{\text{ex}} = 400 \text{ nm}$ , $\lambda_{\text{em}} = 490 \text{ nm}$ ; $\text{ex}=5\text{nm}$ , $\text{em}=10\text{nm}$ ).....                                                                                                                                                                                                                                                                                                                               | 7  |
| <b>Fig. S8</b> Fluorescence spectra of <b>FQ-5</b> ( $1.0 \times 10^{-4} \text{ M}$ ) in various pH values (pH ranged from 2.0 to 13.0 $\text{DMF}/\text{H}_2\text{O}$ (9:1, v/v) HEPES buffered solution ( $\lambda_{\text{ex}} = 400 \text{ nm}$ , $\lambda_{\text{em}} = 490 \text{ nm}$ , $\text{ex} = 5 \text{ nm}$ , $\text{em} = 10 \text{ nm}$ ) .....                                                                                                                                                                                                  | 7  |
| <b>Fig. S9</b> Fluorescence quantum yield according to the corresponding formula, using quinine sulfate as standard ( $\lambda_{\text{ex}} = 400 \text{ nm}$ ; $\lambda_{\text{em}} = 490 \text{ nm}$ ; $\text{ex}=5 \text{ nm}$ ; $\text{em}=10 \text{ nm}$ .).....                                                                                                                                                                                                                                                                                            | 7  |
| <b>Fig. S10</b> Fluorescence quantum yield according to the corresponding formula, using quinine sulfate as standard ( $\lambda_{\text{ex}} = 400 \text{ nm}$ ; $\lambda_{\text{em}} = 490 \text{ nm}$ ; $\text{ex}=5 \text{ nm}$ ; $\text{em}=10 \text{ nm}$ .) .....                                                                                                                                                                                                                                                                                          | 8  |
| <b>Fig.S11</b> (a) Photograph of <b>FQ-5</b> dispersed in different pH values (pH ranged from 2.0 to 13.0 $\text{DMF}/\text{H}_2\text{O}$ (v/v, 9:1) HEPES buffered solution, $C_{\text{FQ-5}} = 1.0 \times 10^{-4} \text{ M}$ ) taken under UV light illumination ( $\lambda_{\text{ex}} = 365 \text{ nm}$ ); (b) Photograph of <b>FQ-5</b> dispersed in different pH values (pH ranged from 2.0 to 13.0 $\text{DMF}/\text{H}_2\text{O}$ (v/v, 9:1) HEPES buffered solution, $C_{\text{FQ-5}} = 1.0 \times 10^{-4} \text{ M}$ ) taken under nature light. .... | 9  |
| <b>Fig.S12</b> The Commission Internationale de L'Eclairage (CIE) for <b>FQ-5</b> ( $1.0 \times 10^{-4} \text{ M}$ ) in $\text{pH}=2$ and $\text{pH}=13$ .....                                                                                                                                                                                                                                                                                                                                                                                                  | 9  |
| <b>Fig.S13</b> (a) Fluorescence cycles of <b>FQ-5</b> in acid-base transformation; (b) Color changes observed for <b>FQ-5</b> upon the addition of acid-base.....                                                                                                                                                                                                                                                                                                                                                                                               | 10 |
| <b>Fig.S14</b> Partial $^1\text{H}$ NMR spectra of <b>FQ-5</b> in $\text{DMSO-}d_6$ with different equiv. of $\text{H}^+/\text{OH}^-$ (a). <b>FQ-5</b> . (b). 0.5 equiv. $\text{OH}^-$ . (c). 1.0 equiv. $\text{OH}^-$ (d). 2.0 equiv. $\text{OH}^-$ (e). 4.0 equiv. $\text{OH}^-$ (f). 0.5 equiv. $\text{H}^+$ (g). 1.0 equiv. $\text{H}^+$ (h). 2.0 equiv. $\text{H}^+$ (i). 4.0 equiv. $\text{H}^+$ .....                                                                                                                                                    | 10 |
| <b>Fig. S15</b> 2D NOESY spectrum of <b>FQ-5</b> under acidic conditions (5mM) in $\text{DMSO-}d_6$ solution....                                                                                                                                                                                                                                                                                                                                                                                                                                                | 11 |
| <b>Fig.S16</b> SEM photos of (a-d) <b>FQ-5</b> ; <b>FQ-5</b> ( $\text{pH}=2$ ); <b>FQ-5</b> ( $\text{pH}=7$ ); <b>FQ-5</b> ( $\text{pH}=12$ ). .....                                                                                                                                                                                                                                                                                                                                                                                                            | 11 |
| <b>Fig.S17</b> DLS data of <b>FQ-5</b> -based aggregates in $\text{pH}=2$ .....                                                                                                                                                                                                                                                                                                                                                                                                                                                                                 | 11 |
| <b>Fig.S18</b> The powder XRD patterns of the <b>FQ-5</b> (black), <b>FQ-5</b> ( $\text{pH}=2$ ) (red).....                                                                                                                                                                                                                                                                                                                                                                                                                                                     | 11 |
| <b>Fig.S19</b> Cartesian coordinates of <b>FQ-5</b> .....                                                                                                                                                                                                                                                                                                                                                                                                                                                                                                       | 13 |
| <b>Fig.S20</b> Cartesian coordinates of <b>FQ-5</b> under alkaline conditions.....                                                                                                                                                                                                                                                                                                                                                                                                                                                                              | 14 |
| <b>Fig.S21</b> Cartesian coordinates of <b>FQ-5</b> under acidic conditions.....                                                                                                                                                                                                                                                                                                                                                                                                                                                                                | 16 |
| <b>Fig. S22</b> The NCI graph dimers of <b>FQ-5</b> under acidic conditions .....                                                                                                                                                                                                                                                                                                                                                                                                                                                                               | 16 |
| <b>Fig.S23</b> The HOMO-LUMO energy gaps for (a) Alkaline; (b) <b>FQ-5</b> (Neutral) and (c) Acidic conditions.....                                                                                                                                                                                                                                                                                                                                                                                                                                             | 16 |
| <b>Fig. S24</b> Photograph of the linear range for L-Arg .....                                                                                                                                                                                                                                                                                                                                                                                                                                                                                                  | 17 |
| <b>Table S1</b> .....                                                                                                                                                                                                                                                                                                                                                                                                                                                                                                                                           | 17 |
| Comparison of detection limit of sensor for L-Arg with previously reported L-Arg sensors .....                                                                                                                                                                                                                                                                                                                                                                                                                                                                  | 17 |
| <b>Fig. S25</b> Photograph of <b>FQ-5</b> dispersed in different amino acids ( $\text{pH} = 7$ $\text{DMF}/\text{H}_2\text{O}$ (v/v, 9:1) HEPES buffered solution, $C_{\text{FQ-5}} = 1.0 \times 10^{-4} \text{ M}$ ) taken under UV light illumination ( $\lambda_{\text{ex}} = 365 \text{ nm}$ )                                                                                                                                                                                                                                                              |    |

|                                                                                                                                                                              |    |
|------------------------------------------------------------------------------------------------------------------------------------------------------------------------------|----|
| .....                                                                                                                                                                        | 18 |
| <b>Fig. S26</b> The Commission Internationale de L'Eclairage (CIE) for <b>FQ-5</b> ( $1.0 \times 10^{-4}$ M) in DMF/H <sub>2</sub> O (9:1, v/v) binary solution.....         | 19 |
| <b>Fig. S27</b> Fluorescence intensity of <b>FQ-5</b> ( $1 \times 10^{-4}$ M) and L-Arg (6 equiv.) in the presence of an excess (6 equiv.) of various other amino acids..... | 19 |
| <b>Fig.S28</b> 2D NOESY spectrum of <b>L-Arg+FQ-5</b> .....                                                                                                                  | 19 |
| <b>Fig.S29</b> Cartesian coordinates of <b>FQ-5+L-Arg</b> .....                                                                                                              | 24 |
| <b>Fig.S30</b> (a) The HOMO-LUMO energy gaps for <b>FQ-5+L-Arg</b> , (b) The NCI graph of <b>FQ-5+L-Arg</b> .....                                                            | 25 |
| <b>Fig. S31</b> UV-Vis Photos of = 12/13 solution before and after being placed in the air for 30 min..                                                                      | 25 |
| <b>Fig. S32</b> Carbon dioxide reactor, please refer to the multimedia file for details.....                                                                                 | 25 |
| <b>Fig. S33</b> FT-IR spectroscopy of powder <b>FQ-5-OH</b> and <b>FQ-5-OH</b> +CO <sub>2</sub> .....                                                                        | 26 |
| <b>Fig. S34</b> ESI-MS spectrum of <b>FQ-5+COO<sup>-</sup></b> .....                                                                                                         | 27 |

Calculation formula of LOD

Linear Equation:  $Y = aX + b$

$$\delta = \sqrt{\frac{\sum_{i=1}^N (F_i - \bar{F})^2}{N - 1}} \quad (N = 20)$$

$$\text{LOD} = K \times \delta / S \quad (K = 3, S = a \times 10^6)$$

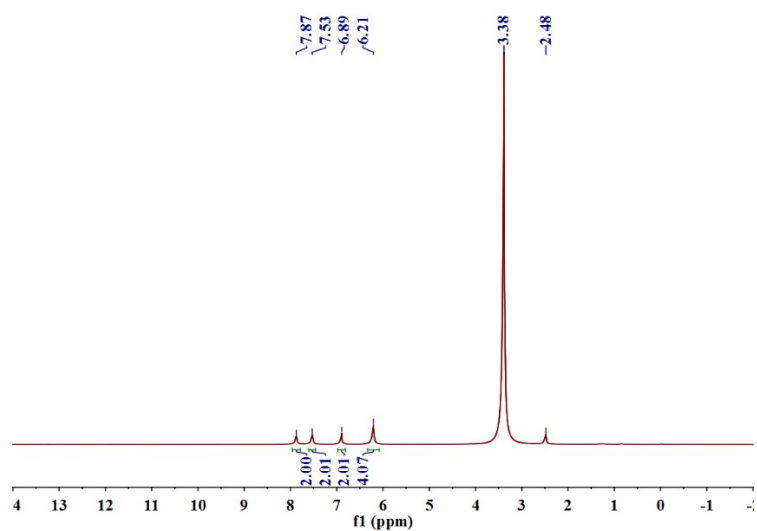

Fig. S1  $^1\text{H}$  NMR spectrum of **1** in  $\text{DMSO-}d_6$

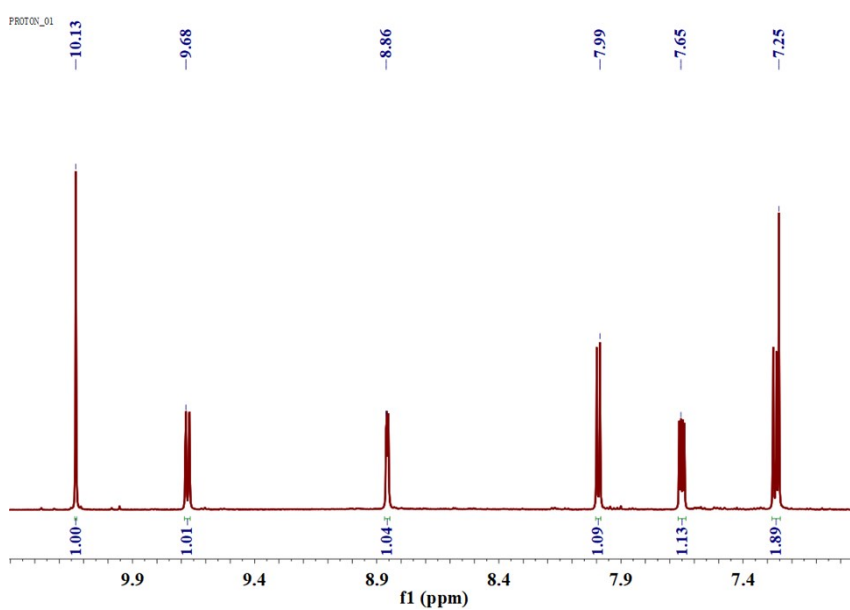

**Fig. S2**  $^1\text{H}$  NMR spectrum of **2** in  $\text{CDCl}_3$

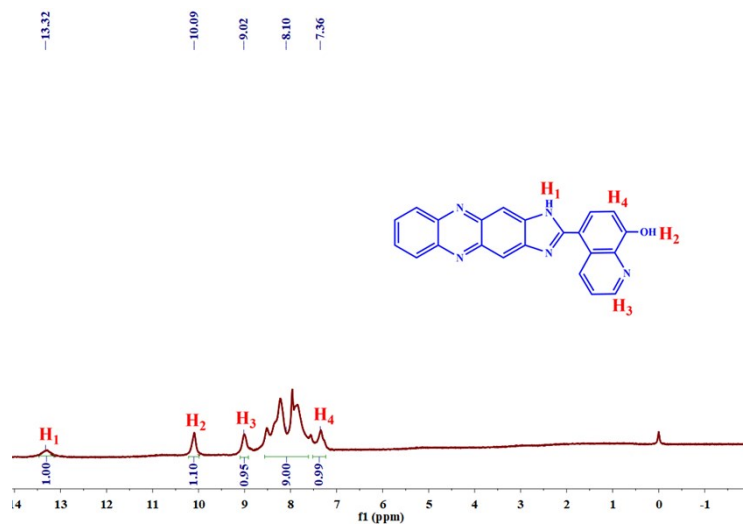

**Fig. S3**  $^1\text{H}$  NMR spectrum of **FQ-5** in  $\text{DMSO}-d_6$

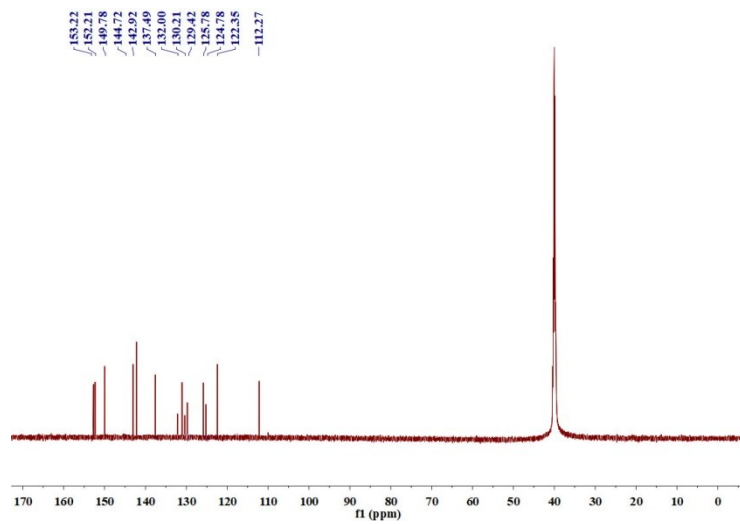

**Fig. S4**  $^{13}\text{C}$  NMR spectrum of **FQ-5** in  $\text{DMSO}-d_6$

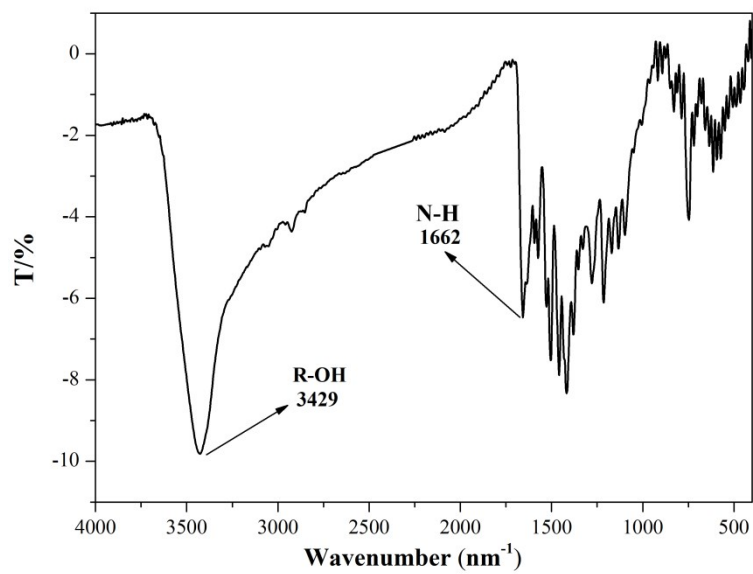

Fig. S5 IR spectrum of FQ-5 in KBr disks

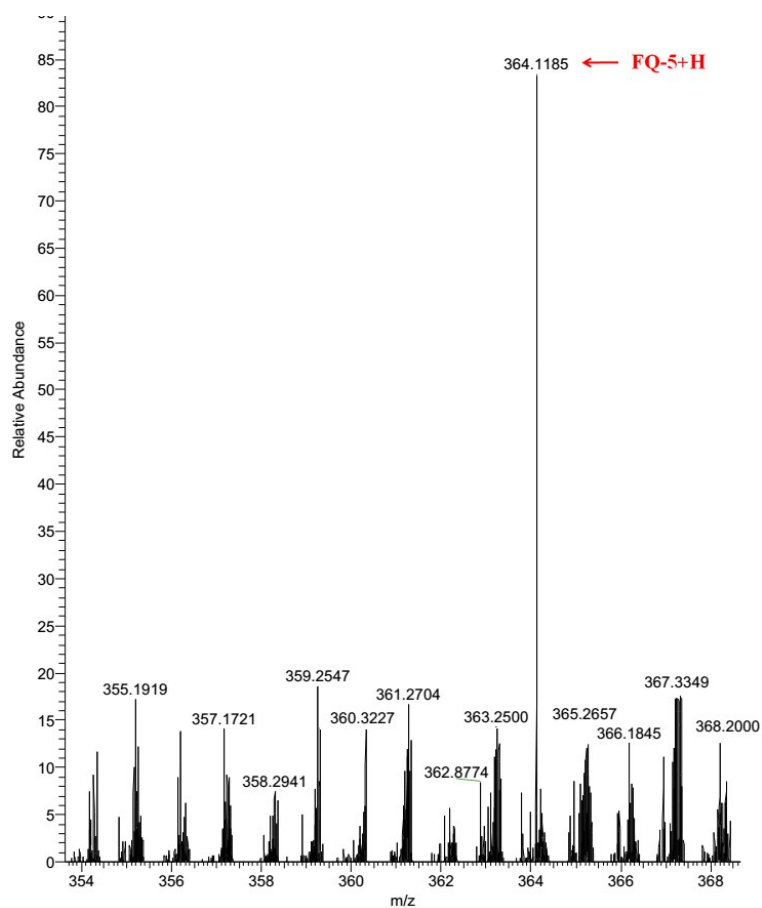

Fig. S6 ESI-MS spectrum of FQ-5

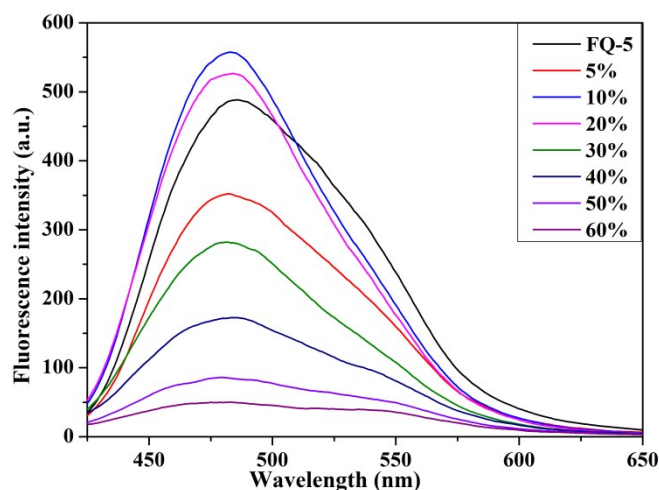

**Fig.S7** Fluorescence emission spectra of **FQ-5** at different water ratios. ( $\lambda_{\text{ex}} = 400 \text{ nm}$ ,  $\lambda_{\text{em}} = 490 \text{ nm}$ ;  $\text{ex}=5\text{nm}$ ,  $\text{em}=10\text{nm}$ )

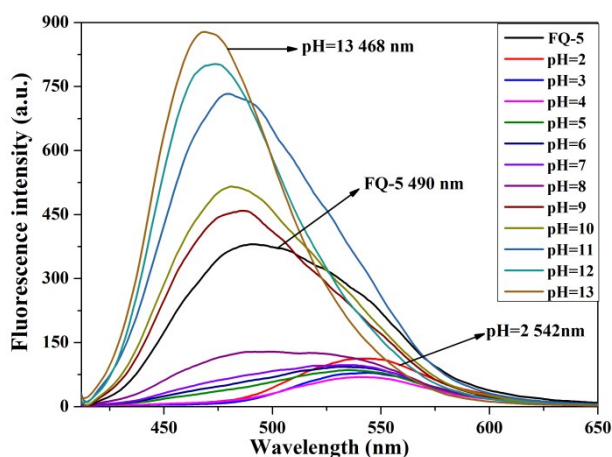

**Fig. S8** Fluorescence spectra of **FQ-5** ( $1.0 \times 10^{-4} \text{ M}$ ) in various pH values (pH ranged from 2.0 to 13.0 DMF/H<sub>2</sub>O (9:1, v/v) HEPES buffered solution ( $\lambda_{\text{ex}} = 400 \text{ nm}$ ,  $\lambda_{\text{em}} = 490 \text{ nm}$ ,  $\text{ex} = 5 \text{ nm}$ ,  $\text{em} = 10 \text{ nm}$ ))

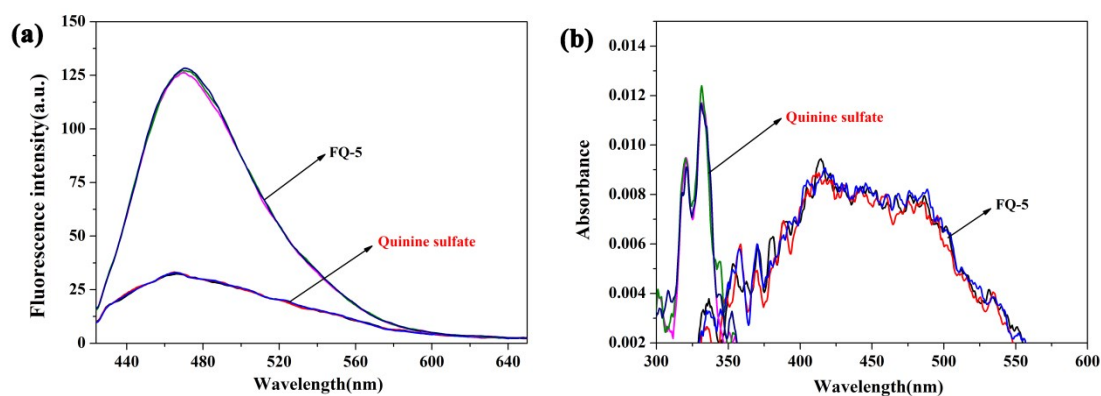

**Fig. S9** Fluorescence quantum yield according to the corresponding formula, using quinine sulfate as standard ( $\lambda_{\text{ex}} = 400 \text{ nm}$ ;  $\lambda_{\text{em}} = 490 \text{ nm}$ ;  $\text{ex}=5 \text{ nm}$ ;  $\text{em}=10 \text{ nm}$ .)

The fluorescence quantum yield of the sample was calculated using quinine sulfate as the standard

( $\Phi_{\text{std}} = 0.55$ ). In this equation,  $\Phi_{\text{unk}}$  and  $\Phi_{\text{std}}$  are the fluorescence quantum yields of the sample and the standard, respectively;  $I_{\text{unk}}$  and  $I_{\text{std}}$  are the integral areas of the fluorescent spectra, respectively;  $A_{\text{unk}}$  and  $A_{\text{std}}$  are the absorbances of the sample and the standard at the excitation wavelength, respectively.

$$\text{pH}=12, \Phi_{\text{unk}} = \Phi_{\text{std}} \times (I_{\text{unk}} / I_{\text{std}}) \times (A_{\text{std}} / A_{\text{unk}}) \quad \Phi_{\text{std}} = 0.55$$

$$I_{\text{unk}}:11.10 \quad I_{\text{std}}: 10.89 \quad A_{\text{std}} :0.013 \quad A_{\text{unk}}: 0.009$$

$$\Phi_{\text{unk}} = 0.55 \times (11.10/10.89) \times (0.013/0.009) = 0.809$$

Fluorescence quantum yield: 80.9 %

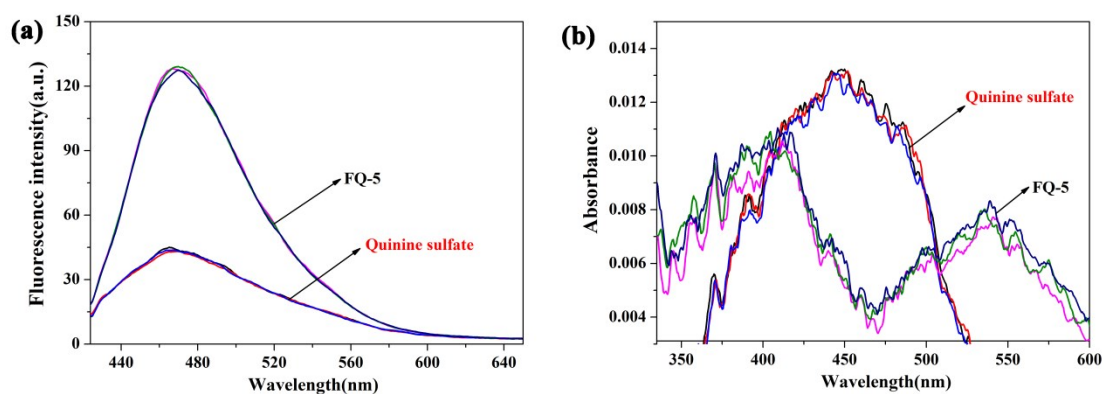

**Fig. S10** Fluorescence quantum yield according to the corresponding formula, using quinine sulfate as standard ( $\lambda_{\text{ex}} = 400 \text{ nm}$ ;  $\lambda_{\text{em}} = 490 \text{ nm}$ ;  $\text{ex}=5 \text{ nm}$ ;  $\text{em}=10 \text{ nm}$ .)

$$\Phi_{\text{unk}} = \Phi_{\text{std}} \times (I_{\text{unk}} / I_{\text{std}}) \times (A_{\text{std}} / A_{\text{unk}}) \quad \Phi_{\text{std}} = 0.55$$

$$I_{\text{unk}}:11.11 \quad I_{\text{std}}:10.87 \quad A_{\text{std}}: 0.014 \quad A_{\text{unk}}: 0.010$$

$$\Phi_{\text{unk}} = 0.55 \times (11.11/10.87) \times (0.014/0.010) = 0.77$$

Fluorescence quantum yield: 77.0 %



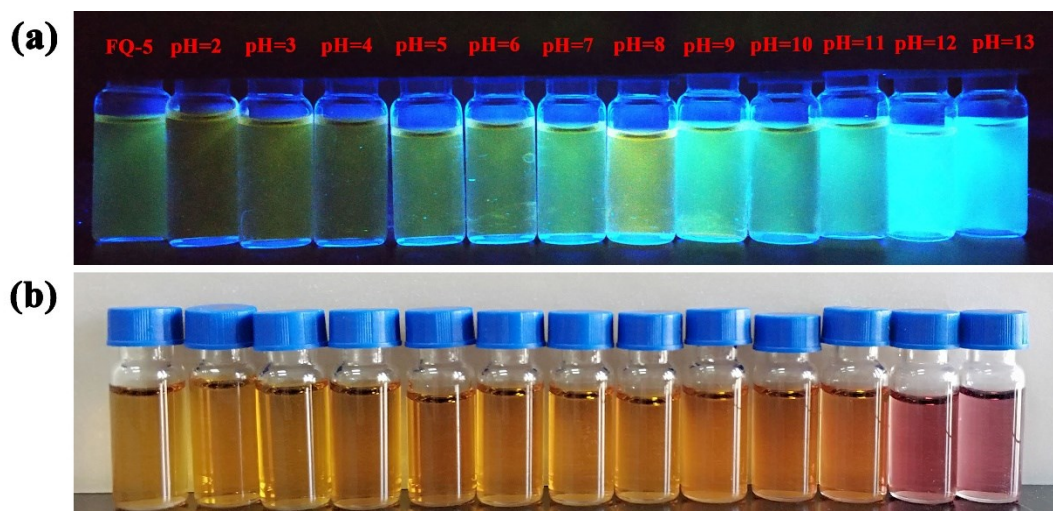

**Fig.S11** (a) Photograph of **FQ-5** dispersed in different pH values (pH ranged from 2.0 to 13.0 DMF/H<sub>2</sub>O (v/v, 9:1) HEPES buffered solution,  $C_{\text{FQ-5}} = 1.0 \times 10^{-4}$  M) taken under UV light illumination ( $\lambda_{\text{ex}} = 365$  nm); (b) Photograph of **FQ-5** dispersed in different pH values (pH ranged from 2.0 to 13.0 DMF/H<sub>2</sub>O (v/v, 9:1) HEPES buffered solution,  $C_{\text{FQ-5}} = 1.0 \times 10^{-4}$  M) taken under nature light.

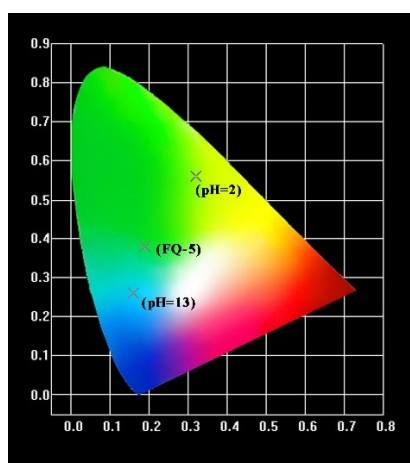

**Fig.S12** The Commission Internationale de L'Eclairage (CIE) for **FQ-5**( $1.0 \times 10^{-4}$  M) in pH=2 and pH=13

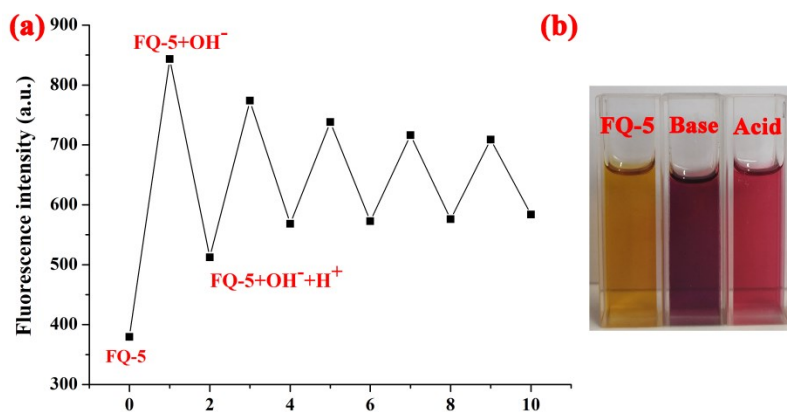

**Fig.S13** (a) Fluorescence cycles of **FQ-5** in acid-base transformation; (b) Color changes observed for **FQ-5** upon the addition of acid-base.

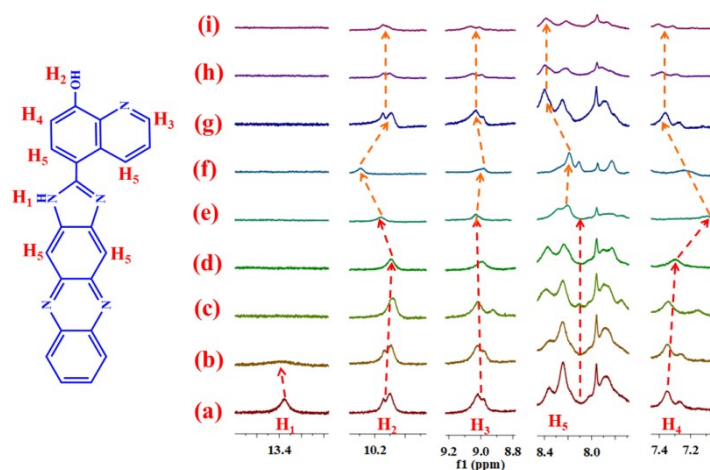

**Fig.S14** Partial  $^1\text{H}$  NMR spectra of **FQ-5** in  $\text{DMSO-}d_6$  with different equiv. of  $\text{H}^+/\text{OH}^-$  (a). **FQ-5**. (b). 0.5 equiv.  $\text{OH}^-$ . (c). 1.0 equiv.  $\text{OH}^-$  (d). 2.0 equiv.  $\text{OH}^-$  (e). 4.0 equiv.  $\text{OH}^-$  (f). 0.5 equiv.  $\text{H}^+$  (g). 1.0 equiv.  $\text{H}^+$  (h). 2.0 equiv.  $\text{H}^+$  (i). 4.0 equiv.  $\text{H}^+$

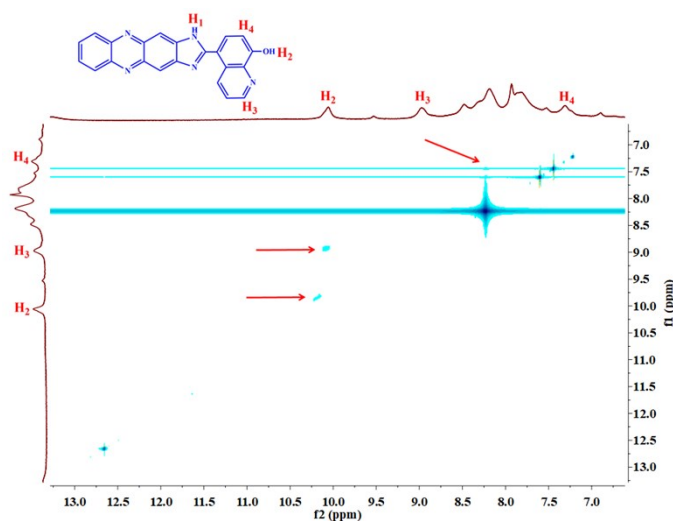

**Fig. S15** 2D NOESY spectrum of FQ-5 under acidic conditions (5mM) in DMSO-*d*6 solution

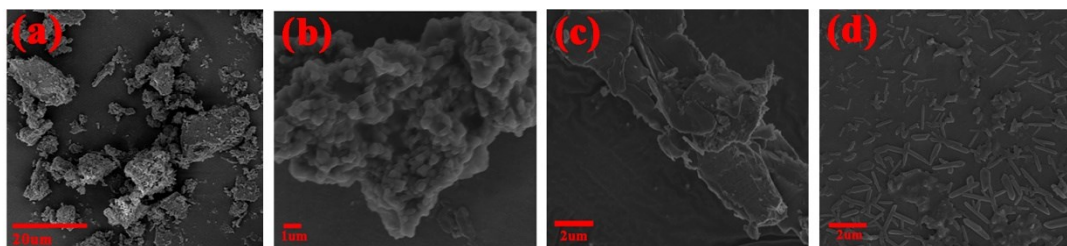

**Fig.S16** SEM photos of (a-d) FQ-5; FQ-5 (pH=2); FQ-5 (pH=7); FQ-5 (pH=12).

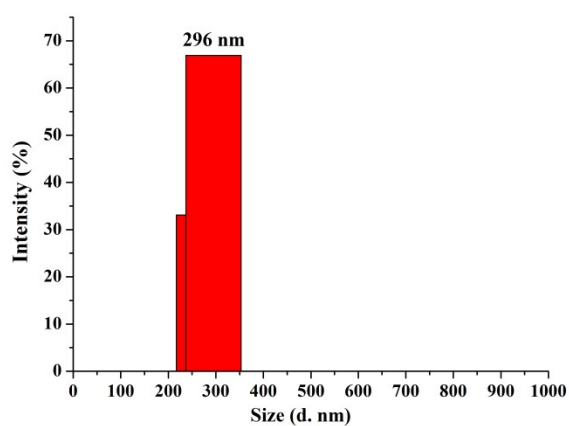

**Fig.S17** DLS data of FQ-5-based aggregates in pH=2

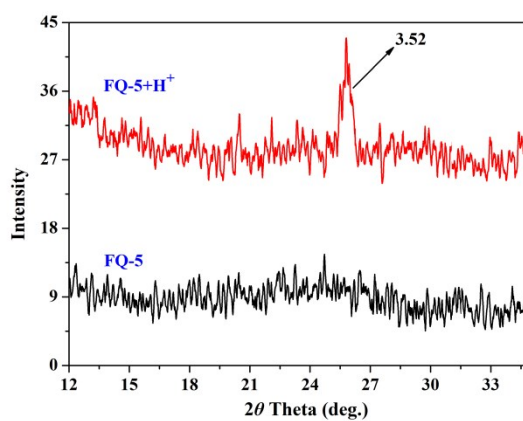

**Fig.S18** The powder XRD patterns of the FQ-5 (black), FQ-5 (pH=2) (red)

Symbolic Z-matrix:

Charge = 0 Multiplicity = 1

|   |          |          |          |
|---|----------|----------|----------|
| C | -7.76825 | -0.41479 | 0.24252  |
| C | -6.63822 | -1.15009 | 0.50378  |
| C | -5.34592 | -0.59403 | 0.24938  |
| C | -5.24879 | 0.748    | -0.28429 |
| C | -6.44779 | 1.48108  | -0.54333 |
| C | -7.67184 | 0.91313  | -0.28632 |
| C | -2.93113 | 0.58741  | -0.28084 |
| C | -3.02778 | -0.76685 | 0.25613  |
| C | -1.85257 | -1.52223 | 0.52021  |
| H | -1.9435  | -2.52546 | 0.9156   |
| C | -0.6328  | -0.94176 | 0.25567  |
| C | -0.55128 | 0.40603  | -0.267   |
| C | -1.65877 | 1.17121  | -0.53993 |
| H | -8.74949 | -0.83605 | 0.43538  |
| H | -6.67985 | -2.15695 | 0.90347  |
| H | -6.34605 | 2.48365  | -0.94314 |
| H | -8.58233 | 1.46983  | -0.4832  |
| H | -1.62283 | 2.17936  | -0.93444 |
| N | -4.04773 | 1.31515  | -0.53966 |
| N | -4.24012 | -1.32622 | 0.50947  |
| N | 0.81605  | 0.64778  | -0.39152 |
| N | 0.66096  | -1.46403 | 0.41651  |
| C | 1.49772  | -0.50924 | 0.02539  |
| H | 1.23193  | 1.43427  | -0.86159 |
| C | 4.82419  | -2.20464 | -0.44837 |
| C | 5.73124  | -1.16772 | -0.33389 |
| C | 5.27285  | 0.14984  | -0.02924 |
| C | 3.87974  | 0.41748  | 0.14639  |
| C | 2.94976  | -0.66273 | -0.03823 |
| C | 3.45011  | -1.9403  | -0.30111 |

|   |         |          |          |
|---|---------|----------|----------|
| H | 5.18021 | -3.20394 | -0.66403 |
| C | 3.55649 | 1.74488  | 0.55578  |
| H | 2.73618 | -2.74865 | -0.40633 |
| C | 4.55275 | 2.69332  | 0.69731  |
| C | 5.89993 | 2.33732  | 0.44478  |
| H | 2.53217 | 2.00338  | 0.79605  |
| H | 4.31517 | 3.70176  | 1.01626  |
| H | 6.69711 | 3.06685  | 0.53876  |
| N | 6.25019 | 1.10001  | 0.10611  |
| O | 7.0745  | -1.36668 | -0.49237 |
| H | 7.52209 | -0.49551 | -0.34899 |

**Fig.S19** Cartesian coordinates of **FQ-5**

Symbolic Z-matrix:

Charge = 0 Multiplicity = 2

|   |          |          |          |
|---|----------|----------|----------|
| C | -7.76825 | -0.41479 | 0.24252  |
| C | -6.63822 | -1.15009 | 0.50378  |
| C | -5.34592 | -0.59403 | 0.24938  |
| C | -5.24879 | 0.748    | -0.28429 |
| C | -6.44779 | 1.48108  | -0.54333 |
| C | -7.67184 | 0.91313  | -0.28632 |
| C | -2.93113 | 0.58741  | -0.28084 |
| C | -3.02778 | -0.76685 | 0.25613  |
| C | -1.85257 | -1.52223 | 0.52021  |
| H | -1.9435  | -2.52546 | 0.9156   |
| C | -0.6328  | -0.94176 | 0.25567  |
| C | -0.55128 | 0.40603  | -0.267   |
| C | -1.65877 | 1.17121  | -0.53993 |
| H | -8.74949 | -0.83605 | 0.43538  |
| H | -6.67985 | -2.15695 | 0.90347  |
| H | -6.34605 | 2.48365  | -0.94314 |

|   |          |          |          |
|---|----------|----------|----------|
| H | -8.58233 | 1.46983  | -0.4832  |
| H | -1.62283 | 2.17936  | -0.93444 |
| N | -4.04773 | 1.31515  | -0.53966 |
| N | -4.24012 | -1.32622 | 0.50947  |
| N | 0.81605  | 0.64778  | -0.39152 |
| N | 0.66096  | -1.46403 | 0.41651  |
| C | 1.49772  | -0.50924 | 0.02539  |
| C | 4.82419  | -2.20464 | -0.44837 |
| C | 5.73124  | -1.16772 | -0.33389 |
| C | 5.27285  | 0.14984  | -0.02924 |
| C | 3.87974  | 0.41748  | 0.14639  |
| C | 2.94976  | -0.66273 | -0.03823 |
| C | 3.45011  | -1.9403  | -0.30111 |
| H | 5.18021  | -3.20394 | -0.66403 |
| C | 3.55649  | 1.74488  | 0.55578  |
| H | 2.73618  | -2.74865 | -0.40633 |
| C | 4.55275  | 2.69332  | 0.69731  |
| C | 5.89993  | 2.33732  | 0.44478  |
| H | 2.53217  | 2.00338  | 0.79605  |
| H | 4.31517  | 3.70176  | 1.01626  |
| H | 6.69711  | 3.06685  | 0.53876  |
| N | 6.25019  | 1.10001  | 0.10611  |
| O | 7.0745   | -1.36668 | -0.49237 |
| H | 7.52209  | -0.49551 | -0.34899 |

**Fig.S20** Cartesian coordinates of **FQ-5** under alkaline conditions

Symbolic Z-matrix:

Charge = 0 Multiplicity = 1

|   |          |          |         |
|---|----------|----------|---------|
| C | -6.48188 | -4.99486 | 5.56349 |
| C | -5.17085 | -4.79099 | 5.90756 |

|   |          |          |         |
|---|----------|----------|---------|
| C | -4.29903 | -4.08257 | 5.02604 |
| C | -4.81904 | -3.58772 | 3.77259 |
| C | -6.18973 | -3.81973 | 3.44974 |
| C | -6.99678 | -4.50399 | 4.32158 |
| C | -2.73303 | -2.70899 | 3.24675 |
| C | -2.20627 | -3.20854 | 4.51254 |
| C | -0.84578 | -2.99442 | 4.85765 |
| H | -0.47178 | -3.37449 | 5.79548 |
| C | -0.04862 | -2.30929 | 3.97215 |
| C | -0.585   | -1.81307 | 2.72387 |
| C | -1.8911  | -1.99715 | 2.34779 |
| H | -7.14196 | -5.53111 | 6.23205 |
| H | -4.75257 | -5.14859 | 6.83758 |
| H | -6.54954 | -3.43603 | 2.50578 |
| H | -8.03582 | -4.67864 | 4.07642 |
| H | -2.31605 | -1.63811 | 1.4222  |
| N | -4.0305  | -2.91193 | 2.90526 |
| N | -3.00766 | -3.88707 | 5.37519 |
| N | 0.49367  | -1.18028 | 2.11181 |
| N | 1.30993  | -1.97435 | 4.06617 |
| C | 1.6097   | -1.31028 | 2.95066 |
| H | 0.51006  | -0.81125 | 1.17849 |
| C | 5.34268  | -1.28683 | 2.86652 |
| C | 5.61556  | -0.18818 | 2.04893 |
| C | 4.58543  | 0.57018  | 1.49111 |
| C | 3.21494  | 0.28771  | 1.78167 |
| C | 2.95091  | -0.8496  | 2.61393 |
| C | 4.01908  | -1.60293 | 3.14148 |
| H | 6.15001  | -1.87697 | 3.28116 |
| C | 2.2474   | 1.21937  | 1.29361 |

|   |         |          |          |
|---|---------|----------|----------|
| H | 3.77602 | -2.44467 | 3.77187  |
| C | 2.62575 | 2.23324  | 0.38051  |
| C | 3.94495 | 2.44439  | 0.07972  |
| H | 1.20983 | 1.1199   | 1.56229  |
| H | 1.8758  | 2.88074  | -0.04741 |
| H | 4.29711 | 3.20232  | -0.59926 |
| N | 4.90838 | 1.64377  | 0.66576  |
| O | 6.91114 | 0.24553  | 1.71953  |
| H | 7.59425 | -0.36781 | 2.03301  |
| H | 5.93866 | 1.81745  | 0.39491  |
| H | 1.72401 | -2.37329 | 4.97962  |

Fig.S21 Cartesian coordinates of FQ-5 under acidic conditions

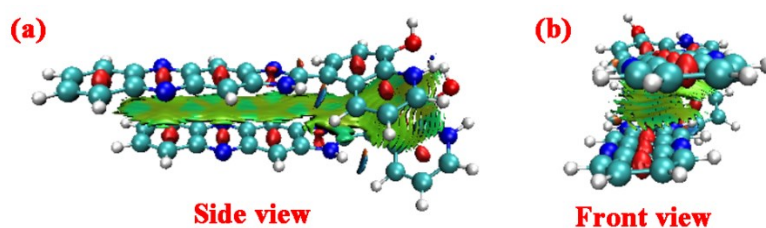

Fig. S22 The NCI graph dimers of FQ-5 under acidic conditions

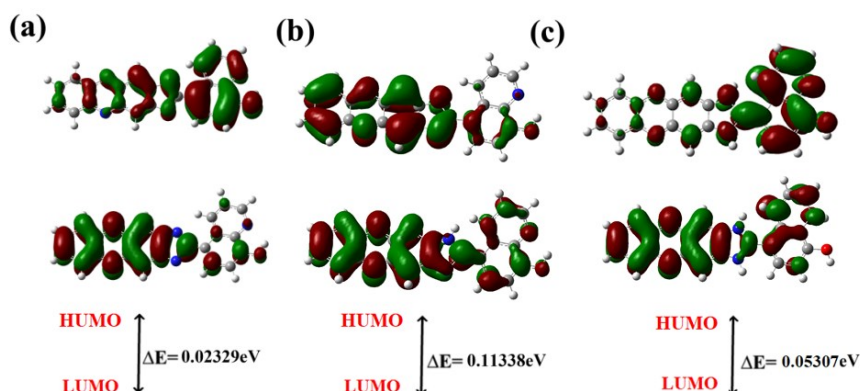

Fig.S23 The HOMO-LUMO energy gaps for (a) Alkaline; (b) FQ-5 (Neutral) and (c) Acidic conditions.



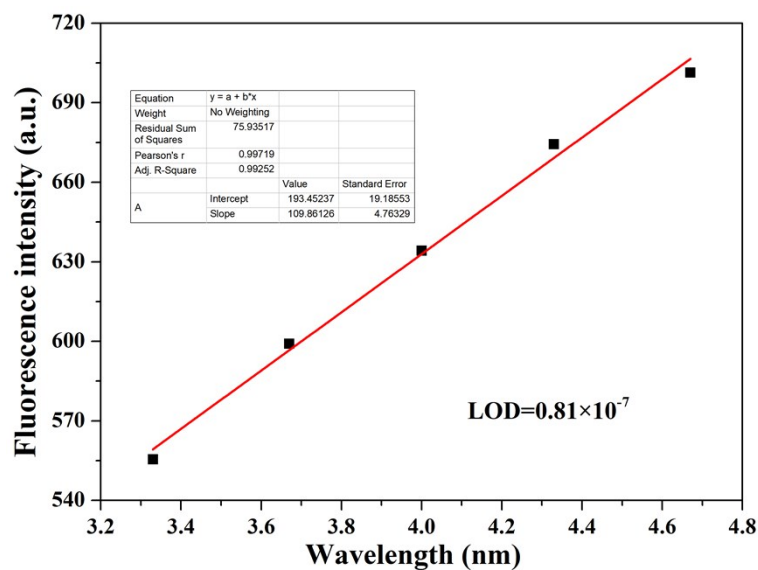

**Fig. S24** Photograph of the linear range for L-Arg

The result of the analysis as follows:

$$\text{Linear Equation: } Y = 109.86X + 193.45, \quad R^2 = 0.9925,$$

$$S = 109.86 \times 10^6$$

$$\text{LOD} = K \times \delta/S = 0.81 \times 10^{-7} \text{ M} \quad (K = 3)$$

$$\text{LOD} = 0.81 \times 10^{-7} \text{ M}$$

**Table S1**

Comparison of detection limit of sensor for L-Arg with previously reported L-Arg sensors

| No | Journal, Year, Volume, Page                          | LOD (M)              | Solvent                               | Ref.  |
|----|------------------------------------------------------|----------------------|---------------------------------------|-------|
| 1  | <i>Sens. Actuators B: Chem.</i> , 2014, 192, 496-502 | $2.3 \times 10^{-6}$ | CH <sub>3</sub> OH/Tris buffer (pH=7) | 57(a) |
| 2  | <i>Chem. Commun.</i> , 2011, 47, 3921-3923           | $2.0 \times 10^{-6}$ | HEPES (pH=7.4)                        | 57(b) |
| 3  | <i>Biosens. Bioelectron.</i> , 2017, 87, 772-778     | $3.4 \times 10^{-8}$ | Phosphate buffer (pH=7.4)             | 57(c) |
| 4  | <i>Macromol. Res.</i> , 2012, 20, 344-346            | $1.0 \times 10^{-5}$ | Water                                 | 57(d) |

|   |                                             |                       |                                                              |       |
|---|---------------------------------------------|-----------------------|--------------------------------------------------------------|-------|
| 5 | <i>Talanta</i> , 2012, 97, 16-22            | $2.3 \times 10^{-6}$  | CH <sub>3</sub> COOH-CH <sub>3</sub> COONa<br>buffer(pH=6.0) | 58(a) |
| 6 | <i>New J. Chem.</i> , 2020, 44, 4842-4849   | $1.5 \times 10^{-7}$  | Tris/HCl buffer<br>(pH=4.0)                                  | 58(b) |
| 7 | <i>New J. Chem.</i> , 2017, 41, 15216-15228 | $2.85 \times 10^{-8}$ | pH 7.4 adjusted solution                                     | 58(c) |
| 8 | <i>Langmuir</i> , 2014, 30, 15364-1537      | $1.7 \times 10^{-7}$  | HEPES buffe (pH=7.4)                                         | 58(d) |
|   | This work                                   | $8.1 \times 10^{-8}$  | DMF/Tris HEPES<br>(pH=7.4)                                   |       |

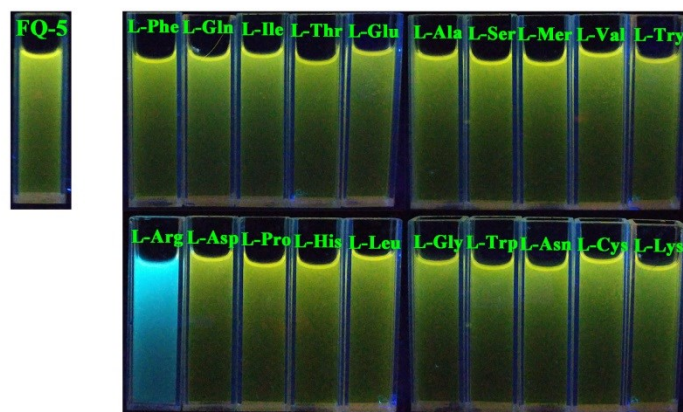

**Fig. S25** Photograph of **FQ-5** dispersed in different amino acids (pH =7 DMF/H<sub>2</sub>O (v/v, 9:1) HEPES buffered solution,  $C_{\text{FQ-5}} = 1.0 \times 10^{-4}$  M) taken under UV light illumination ( $\lambda_{\text{ex}} = 365$  nm)

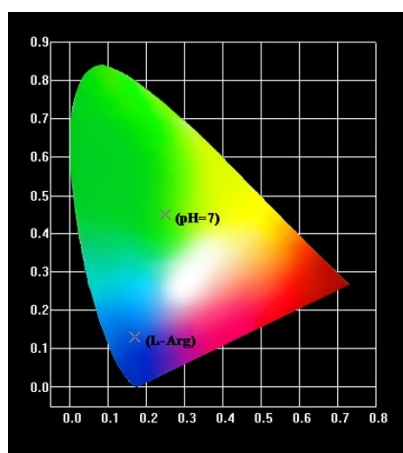

**Fig. S26** The Commission Internationale de L'Eclairage (CIE) for **FQ-5** ( $1.0 \times 10^{-4}$  M) in DMF/H<sub>2</sub>O (9:1, v/v) binary solution

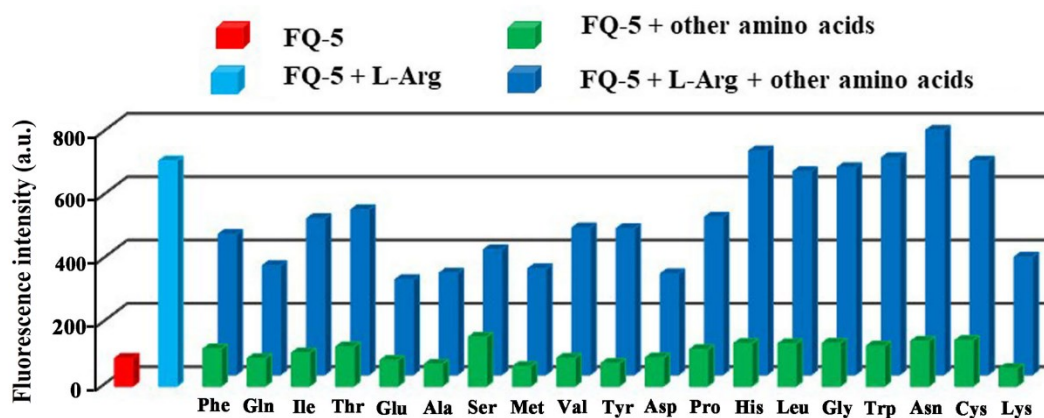

**Fig. S27** Fluorescence intensity of **FQ-5** ( $1 \times 10^{-4}$  M) and L-Arg (6 equiv.) in the presence of an excess (6 equiv.) of various other amino acids.

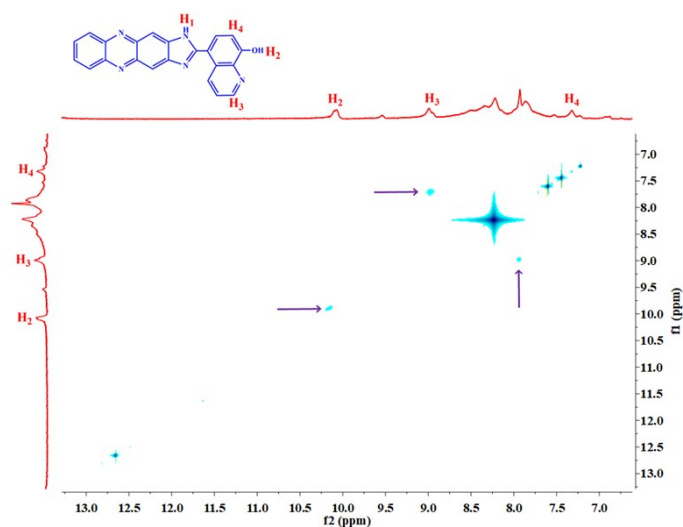

**Fig.S28** 2D NOESY spectrum of **L-Arg+ FQ-5**

Symbolic Z-matrix:

Charge = 0 Multiplicity = 2

|   |          |          |          |
|---|----------|----------|----------|
| C | -7.18342 | 0.16431  | -5.10334 |
| C | -5.89692 | 0.555    | -5.36682 |
| C | -4.80093 | -0.12491 | -4.75364 |

|   |          |          |          |
|---|----------|----------|----------|
| C | -5.06959 | -1.2255  | -3.85634 |
| C | -6.42364 | -1.60212 | -3.60674 |
| C | -7.4493  | -0.92538 | -4.21359 |
| C | -2.78901 | -1.51201 | -3.51624 |
| C | -2.51684 | -0.40078 | -4.4201  |
| C | -1.17988 | -0.00136 | -4.68464 |
| H | -0.99578 | 0.82447  | -5.35352 |
| C | -0.16279 | -0.68886 | -4.06925 |
| C | -0.44528 | -1.79473 | -3.18271 |
| C | -1.71902 | -2.21356 | -2.89528 |
| H | -8.01332 | 0.67908  | -5.56777 |
| H | -5.66346 | 1.37318  | -6.0325  |
| H | -6.59365 | -2.42811 | -2.93144 |
| H | -8.4749  | -1.2113  | -4.0238  |
| H | -1.95838 | -3.03399 | -2.2353  |
| N | -4.06358 | -1.89923 | -3.25428 |
| N | -3.53608 | 0.26849  | -5.01984 |
| N | 0.81087  | -2.23784 | -2.77104 |
| N | 1.22633  | -0.49531 | -4.15364 |
| C | 1.77734  | -1.41986 | -3.37822 |
| H | 0.98461  | -2.89811 | -2.03545 |
| C | 5.33551  | -0.3407  | -2.80641 |

|   |          |          |          |
|---|----------|----------|----------|
| C | 5.98455  | -1.52281 | -2.51904 |
| C | 5.27121  | -2.75594 | -2.56233 |
| C | 3.88101  | -2.78411 | -2.88543 |
| C | 3.21179  | -1.53576 | -3.12098 |
| C | 3.96114  | -0.3605  | -3.10177 |
| H | 5.88769  | 0.58633  | -2.78756 |
| C | 3.3043   | -4.08155 | -3.00557 |
| H | 3.44827  | 0.56572  | -3.31433 |
| C | 4.06179  | -5.20678 | -2.75406 |
| C | 5.4199   | -5.06902 | -2.38543 |
| H | 2.28045  | -4.18899 | -3.33127 |
| H | 3.63237  | -6.19327 | -2.85269 |
| H | 6.03247  | -5.93348 | -2.17171 |
| N | 6.0109   | -3.8816  | -2.30571 |
| O | 7.31598  | -1.55199 | -2.20198 |
| H | 7.57038  | -2.4908  | -2.05473 |
| N | -2.31987 | -1.14258 | 0.50968  |
| H | -2.96721 | -1.34671 | -0.22468 |
| C | -1.32805 | -0.10119 | 0.33248  |
| H | -1.46594 | 0.66603  | 1.09435  |
| C | 0.08476  | -0.66192 | 0.45566  |
| C | -1.45326 | 0.54709  | -1.03885 |

|   |          |          |          |
|---|----------|----------|----------|
| H | 0.2161   | -1.10356 | 1.44348  |
| H | 0.24106  | -1.42513 | -0.30669 |
| C | 1.09656  | 0.46278  | 0.26344  |
| O | -2.31511 | 0.17107  | -1.83022 |
| O | -0.69404 | 1.45449  | -1.3715  |
| H | 0.96614  | 0.90463  | -0.72441 |
| H | 0.94118  | 1.22621  | 1.02576  |
| C | 2.50938  | -0.09795 | 0.38662  |
| H | 2.64071  | -0.53959 | 1.37444  |
| H | 2.66567  | -0.86116 | -0.37573 |
| N | 3.52053  | 0.96746  | 0.20528  |
| H | 3.20176  | 1.90924  | 0.0277   |
| C | 4.82979  | 0.74137  | 0.2655   |
| N | 5.3258   | -0.47109 | 0.49535  |
| N | 5.65037  | 1.77283  | 0.08768  |
| H | 4.69988  | -1.25224 | 0.62995  |
| H | 6.32612  | -0.60509 | 0.53424  |
| H | 5.27043  | 2.69226  | -0.08667 |
| H | 6.6497   | 1.63196  | 0.12782  |
| H | -2.35701 | -1.65715 | 1.36632  |
| H | -1.55229 | -1.62247 | 0.08479  |
| C | -6.51253 | 0.51321  | 3.10079  |

|   |          |          |         |
|---|----------|----------|---------|
| C | -5.30286 | 0.14077  | 3.62531 |
| C | -4.14126 | 0.93589  | 3.38466 |
| C | -4.26213 | 2.13288  | 2.58389 |
| C | -5.53958 | 2.48701  | 2.05446 |
| C | -6.63177 | 1.69853  | 2.3067  |
| C | -1.99166 | 2.54776  | 2.85159 |
| C | -1.86823 | 1.3395   | 3.65829 |
| C | -0.60934 | 0.96019  | 4.19523 |
| H | -0.53453 | 0.06194  | 4.78753 |
| C | 0.47586  | 1.76012  | 3.93391 |
| C | 0.33865  | 2.96042  | 3.14071 |
| C | -0.85485 | 3.36434  | 2.59958 |
| H | -7.39215 | -0.08882 | 3.28314 |
| H | -5.18    | -0.74761 | 4.22759 |
| H | -5.59922 | 3.3868   | 1.45946 |
| H | -7.59922 | 1.96749  | 1.90506 |
| H | -0.98495 | 4.25399  | 2.00161 |
| N | -3.18991 | 2.91702  | 2.33107 |
| N | -2.95302 | 0.55959  | 3.90615 |
| N | 1.62337  | 3.5008   | 3.10568 |
| N | 1.81427  | 1.61021  | 4.33444 |
| C | 2.47013  | 2.6481   | 3.83213 |

|   |         |         |         |
|---|---------|---------|---------|
| H | 1.92246 | 4.25732 | 2.51792 |
| C | 6.12713 | 1.78867 | 4.0317  |
| C | 6.74339 | 3.02196 | 4.05323 |
| C | 5.95754 | 4.21093 | 4.06347 |
| C | 4.53185 | 4.1439  | 4.0354  |
| C | 3.91301 | 2.85097 | 3.95131 |
| C | 4.724   | 1.71757 | 3.97986 |
| H | 6.73005 | 0.89366 | 4.04108 |
| C | 3.8555  | 5.39179 | 4.16076 |
| H | 4.23997 | 0.75273 | 3.9498  |
| C | 4.57211 | 6.56818 | 4.23682 |
| C | 5.98513 | 6.53132 | 4.20037 |
| H | 2.77856 | 5.41691 | 4.23464 |
| H | 4.0649  | 7.51638 | 4.34138 |
| H | 6.57024 | 7.43891 | 4.24663 |
| N | 6.65809 | 5.38772 | 4.1303  |
| O | 8.10677 | 3.14277 | 4.07934 |
| H | 8.32397 | 4.10175 | 4.11008 |

**Fig.S29** Cartesian coordinates of **FQ-5+L-Arg**



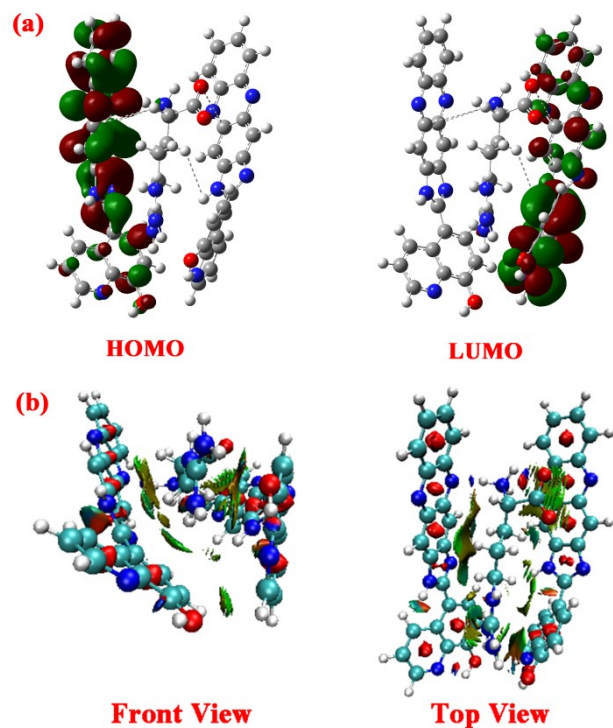

**Fig.S30** (a) The HOMO-LUMO energy gaps for **FQ-5+L-Arg**, (b) The NCI graph of **FQ-5+L-Arg**.

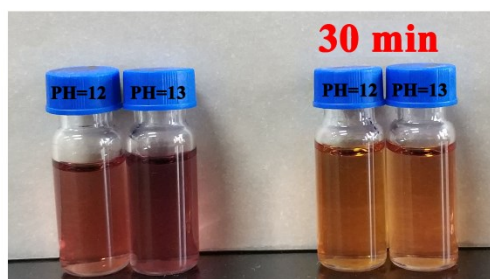

**Fig. S31** UV-Vis Photos of = 12/13 solution before and after being placed in the air for 30 min

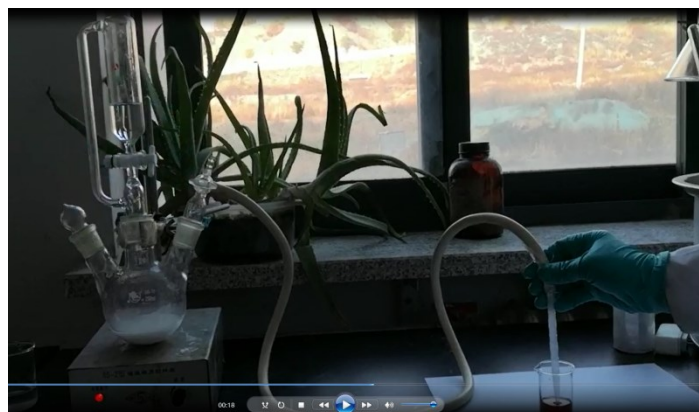

**Fig. S32** Carbon dioxide reactor, please refer to the multimedia file for details

**Equipment:** Three-necked flask, constant pressure funnel, catheter, HCl (dilute), CaCO<sub>3</sub>, beaker, magneton, stirrer, FQ-5(1.0 × 10<sup>-4</sup> M, DMF/H<sub>2</sub>O (9:1, v/v)) and HEPES buffered solution (pH=12/13)

**Describe:** First, we designed a carbon dioxide reactor through chemical reactions: CaCO<sub>3</sub>+2HCl (dilute) =CaCl<sub>2</sub>+CO<sub>2</sub>+H<sub>2</sub>O. A small amount of CaCO<sub>3</sub> is placed in a three-necked flask with one end sealed and the other end inserted into a catheter. In addition, pour a little into HCl (dilute) the constant pressure funnel. Then, the funnel pistons and stirrer were opened to allow the reaction to take place, and the catheter was passed into FQ-5 with pH 12/13, and it was obvious that the solution changed from purple to orange.

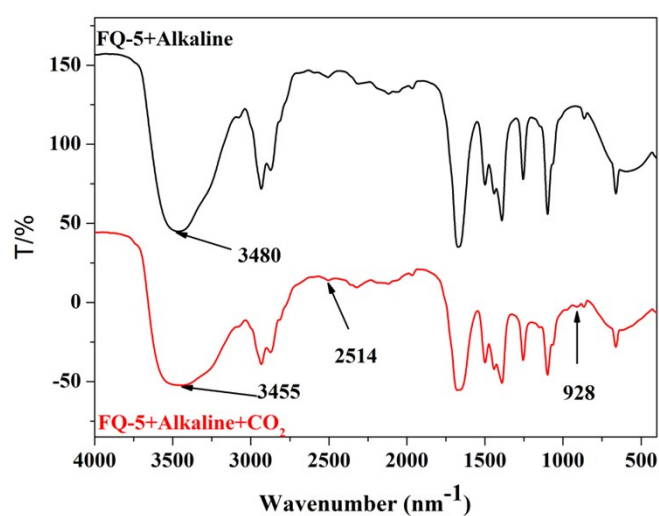

Fig. S33 FT-IR spectroscopy of powder FQ-5-OH and FQ-5-OH +CO<sub>2</sub>

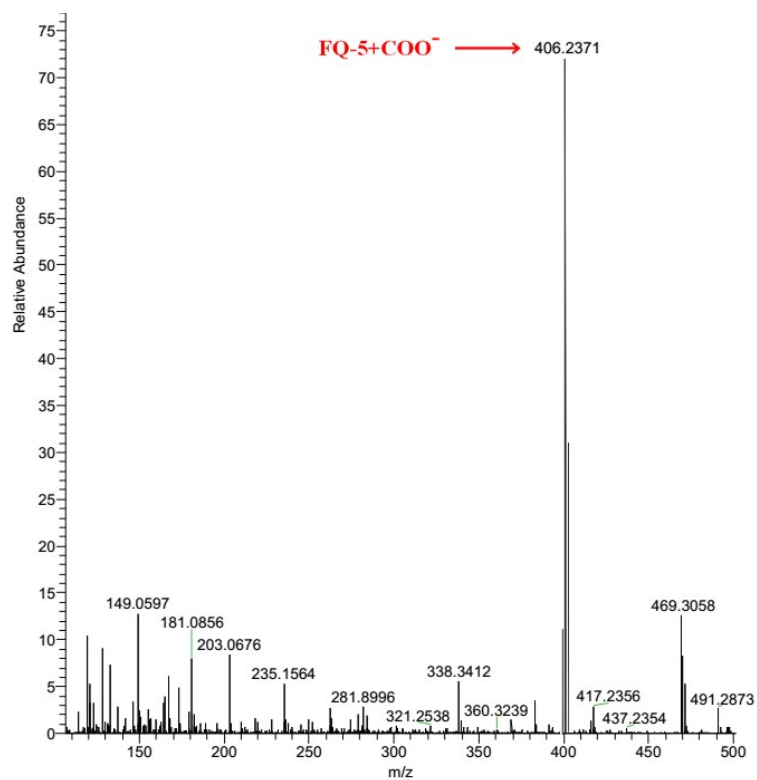

**Fig. S34** ESI-MS spectrum of FQ-5+COO<sup>-</sup>
